# Supplementary material for: Electronic regulation of single-atomic Ti sites on metal hydroxide for boosting photocatalytic CO2 reduction
Source: Royal Society of Chemistry journal article supplement (doi:10.1039/d4sc07257j), 2024-12-05
Supplement: d4sc07257j1.pdf [file d4sc07257j1.pdf]

## Electronic Supplementary Information (ESI) for

# Electronic regulation of single-atomic Ti sites on metal hydroxide for boosting photocatalytic CO<sub>2</sub> reduction

Ning-Yu Huang,<sup>‡a</sup> Bai Li,<sup>‡c</sup> Duojie Wu,<sup>d</sup> Di Chen,<sup>a</sup> Yu-Tao Zheng,<sup>a</sup> Bing Shao,<sup>a</sup> Wenjuan Wang,<sup>a</sup> Meng Gu,<sup>d</sup> Lei Li<sup>\*c</sup>  
and Qiang Xu<sup>\*a,b</sup>

<sup>a</sup> Shenzhen Key Laboratory of Micro/Nano-Porous Functional Materials (SKLPM), SUSTech-Kyoto University Advanced Energy Materials Joint Innovation Laboratory (SKAEM-JIL), Department of Chemistry and Department of Materials Science and Engineering, Southern University of Science and Technology, Shenzhen 518055, China.

<sup>b</sup> Institute for Integrated Cell-Material Sciences (WPI-iCeMS), Kyoto University, Yoshida, Sakyo-ku, Kyoto 606-8501, Japan.

<sup>c</sup> Shenzhen Key Laboratory of Micro/Nano-Porous Functional Materials (SKLPM) and Department of Materials Science and Engineering, Southern University of Science and Technology, Shenzhen 518055, China.

<sup>d</sup> Department of Materials Science and Engineering and Guangdong Provincial Key Laboratory of Energy Materials for Electric Power, Southern University of Science and Technology, Shenzhen 518055, China

[<sup>‡</sup>] These authors contributed equally to this work.

\*Corresponding authors: lil33@sustech.edu.cn, xuq@sustech.edu.cn, xu.qiang@icems.kyoto-u.ac.jp

## Table of Contents

### Experimental section

**Fig. S1.** PXRD patterns of Ni(OH)<sub>2</sub>, d-Ni(OH)<sub>2</sub> and Ti<sub>1</sub>/Ni(OH)<sub>2</sub> synthesized after 5 cycles.

**Fig. S2.** SEM images of Ni(OH)<sub>2</sub>, d-Ni(OH)<sub>2</sub> and Ti<sub>1</sub>/Ni(OH)<sub>2</sub>.

**Fig. S3.** TEM images of d-Ni(OH)<sub>2</sub>.

**Fig. S4.** Ni 2p and O 1s XPS spectra of Ni(OH)<sub>2</sub>, d-Ni(OH)<sub>2</sub> and Ti<sub>1</sub>/Ni(OH)<sub>2</sub>.

**Fig. S5.** Ni K-edge XANES and EXAFS spectra of d-Ni(OH)<sub>2</sub>, Ni(OH)<sub>2</sub> and Ni foil.

**Fig. S6.** Zeta potentials of Ni(OH)<sub>2</sub>, d-Ni(OH)<sub>2</sub> and Ti<sub>1</sub>/Ni(OH)<sub>2</sub>.

**Fig. S7.** Raman spectra of Ti<sub>1</sub>/Ni(OH)<sub>2</sub>, d-Ni(OH)<sub>2</sub> and Ni(OH)<sub>2</sub>.

**Fig. S8.** EPR spectra of Ni(OH)<sub>2</sub>, d-Ni(OH)<sub>2</sub> and Ti<sub>1</sub>/Ni(OH)<sub>2</sub>.

**Fig. S9.** EDS spectra of Ti<sub>1</sub>/Ni(OH)<sub>2</sub>.

**Fig. S10.** HAADF-STEM image of Ti<sub>1</sub>/Ni(OH)<sub>2</sub> and the corresponding brightness intensity.

**Fig. S11.** PXRD patterns of Ti<sub>1</sub>/Ni(OH)<sub>2</sub>, Zr<sub>1</sub>/Ni(OH)<sub>2</sub> and Hf<sub>1</sub>/Ni(OH)<sub>2</sub>.

**Fig. S12.** HAADF-STEM image of Zr<sub>1</sub>/Ni(OH)<sub>2</sub> and the corresponding elemental mapping images.

**Fig. S13.** HAADF-STEM image of Hf<sub>1</sub>/Ni(OH)<sub>2</sub> and the corresponding elemental mapping images.

**Fig. S14.** Fitted average oxidation states of Ti in Ti foil, TiO<sub>2</sub> and Ti<sub>1</sub>/Ni(OH)<sub>2</sub>.

**Fig. S15.** GC profiles for the gaseous products from the photocatalytic experiments of Ti<sub>1</sub>/Ni(OH)<sub>2</sub>.

**Fig. S16.** <sup>1</sup>H NMR spectra of the liquid products from the photocatalytic experiments of Ti<sub>1</sub>/Ni(OH)<sub>2</sub>.

**Fig. S17.** Performance of photocatalytic CO<sub>2</sub> reduction using Ti<sub>1</sub>/Ni(OH)<sub>2</sub> prepared under different conditions.

**Fig. S18.** Comparison of the photocatalytic performances of Ti<sub>1</sub>/Ni(OH)<sub>2</sub>, anatase TiO<sub>2</sub> and the mixture of Ni(OH)<sub>2</sub> + TiO<sub>2</sub>.

**Fig. S19.** Stability test of Ti<sub>1</sub>/Ni(OH)<sub>2</sub> after photocatalytic experiments.

**Fig. S20.** Control experiments of catalytic conditions.

**Fig. S21.** UV-vis spectra of Ti<sub>1</sub>/Ni(OH)<sub>2</sub>, d-Ni(OH)<sub>2</sub> and Ni(OH)<sub>2</sub>.

**Fig. S22.** PL emission spectra of [Ru(phen)<sub>3</sub>]Cl<sub>2</sub>·6H<sub>2</sub>O with the colloidal suspension of Ni(OH)<sub>2</sub>, d-Ni(OH)<sub>2</sub> and Ti<sub>1</sub>/Ni(OH)<sub>2</sub>.

**Fig. S23.** EIS Nyquist plots of Ni(OH)<sub>2</sub>, d-Ni(OH)<sub>2</sub> and Ti<sub>1</sub>/Ni(OH)<sub>2</sub>.

**Fig. S24.** Atomic structures of Ni(OH)<sub>2</sub>, d-Ni(OH)<sub>2</sub> and Ti<sub>1</sub>/Ni(OH)<sub>2</sub>.

**Fig. S25.** Adsorption configurations of intermediates involved in photocatalytic CO<sub>2</sub> reduction on Ni(OH)<sub>2</sub>, d-Ni(OH)<sub>2</sub> and Ti<sub>1</sub>/Ni(OH)<sub>2</sub>.

**Fig. S26.** In-situ FTIR spectra of the photocatalytic CO<sub>2</sub> reduction on Ti<sub>1</sub>/Ni(OH)<sub>2</sub>.

**Fig. S27.** Charge density distribution of Ni(OH)<sub>2</sub>, d-Ni(OH)<sub>2</sub> and Ti<sub>1</sub>/Ni(OH)<sub>2</sub>.

**Table S1.** ICP-MS analysis results of Ti<sub>1</sub>/Ni(OH)<sub>2</sub>.

**Table S2.** EXAFS fitting parameters at the Ti K-edge for various samples

**Table S3** Comparison of the photocatalytic activities of  $\text{Ti}_1/\text{Ni}(\text{OH})_2$  and other reported catalysts for photocatalytic  $\text{CO}_2$  reduction to  $\text{CO}$ .

## **Experimental section**

**Chemicals and Materials.** All reagents were commercially available and used without further purification. Nickel(II) nitrate hexahydrate ( $\text{Ni}(\text{NO}_3)_2 \cdot 6\text{H}_2\text{O}$ ,  $\geq 98\%$ ), *N,N*-dimethylformamide (DMF,  $\geq 99.9\%$ ), Acetonitrile ( $\text{CH}_3\text{CN}$ ,  $\geq 99.9\%$ ), titanium diisopropoxide bis(acetylacetonate) (75 wt% in isopropanol) and isopropanol ( $\geq 99.5\%$ ) were purchased from Shanghai Aladdin Biochemical Technology Co., Ltd. Urea ( $\geq 99.0\%$ ) and ethanol ( $\text{C}_2\text{H}_5\text{OH}$ ,  $\geq 99.7\%$ ) were purchased from Shanghai Lingfeng Chemical Reagent Co., Ltd.  $\text{Ru}(\text{phen})_3\text{Cl}_2 \cdot \text{H}_2\text{O}$  (phen = 1,10-phenanthroline,  $\geq 98\%$ ) and 1,3-dimethyl-2-phenyl-2,3-dihydro-1*H*-benzo[*d*]imidazole (BIH,  $\geq 97\%$ ) were purchased from Bide Pharmatech Co., Ltd. Isopropanol ( $\geq 99.0\%$ ) was purchased from Shanghai Macklin Biochemical Co., Ltd.

**Structural and morphological characterizations.** Powder X-ray diffraction (PXRD) patterns were collected on a Rigaku SmartLab 9KW diffractometer with Cu  $K\alpha$  radiation. X-ray photoelectron spectroscopy (XPS) measurements were performed with a Thermo Fisher ESCALAB Xi+ instrument. Scanning electron microscope (SEM) images were obtained from Hitachi Regulus 8100 apparatus with an acceleration voltage of 10 kV. High-angle annular dark-field scanning transmission electron microscopy (HAADF-STEM) images were captured on Titan Cubed Themis G2 300 with a Bruker Quantax Super-X EDS detector. Silicon-contained contaminations from TEM specimens can be removed using plasma cleaner.<sup>1</sup> The X-ray absorption spectroscopy (XAS) data were collected at the BL-11B beamlines in the Shanghai Synchrotron Radiation Facility (SSRF) (Shanghai, China). UV-vis spectra were collected on a Shimadzu UV-3600i Plus instrument. Photoluminescence measurements were carried out on the HORIBA FluoroMax Plus R928P spectrofluorometer. The Mott-Schottky, photocurrent and electrochemical impedance spectroscopy (EIS) measurements were carried out on a CHI660e electrochemical workstation in 0.5 M  $\text{Na}_2\text{SO}_4$  electrolyte with standard three electrode system, in which fluorine-doped tin oxide (FTO) glass, Ag/AgCl electrode and graphite rod was used as working electrode, reference electrode and counter electrode, respectively. The EIS measurement was performed at  $-0.5$  V vs. Ag/AgCl over a frequency range from 0.1 Hz to 1.0 MHz with an AC voltage amplitude of 10 mV.

**Synthesis of  $\text{Ni}(\text{OH})_2$ .**  $\text{Ni}(\text{OH})_2$  was synthesized via a typical hydrothermal reaction.<sup>2</sup> A mixture of  $\text{Ni}(\text{NO}_3)_2 \cdot 6\text{H}_2\text{O}$  (1.05 g), urea (217.5 mg) and 60 mL distilled  $\text{H}_2\text{O}$  was mixed and sealed in a 100-mL Teflon vial. The vial was heated at 200 °C for 20 h. After cooling to room temperature, green powders were collected by centrifugation, washed with  $\text{H}_2\text{O}$  and  $\text{C}_2\text{H}_5\text{OH}$ , and then dried under vacuum at 60 °C.

**Synthesis of d- $\text{Ni}(\text{OH})_2$ .** The as-synthesized  $\text{Ni}(\text{OH})_2$  (50.0 mg) was dispersed in a mixture of 4 mL DMF, 1.5 mL  $\text{H}_2\text{O}$  and 1.5 mL ethanol. After ultrasonication for 15 min, the mixture was sealed in a 25-mL Teflon vial and heated at 140 °C for 8 h. After cooling down to room temperature, green powders were collected by centrifugation, washed with DMF and  $\text{C}_2\text{H}_5\text{OH}$ , and then dried under vacuum at 60 °C.

**Synthesis of  $\text{Ti}_1/\text{Ni}(\text{OH})_2$ .** 50.0 mg of d- $\text{Ni}(\text{OH})_2$  was dispersed in 1 mL isopropanol, followed by

the addition of 1 mL titanium diisopropoxide bis(acetylacetonate). The mixture was stirred under room temperature for 12 h and collected by centrifugation. After washing with ethanol for three time, the resulting powders were dried under vacuum at 60 °C and denoted as Ti<sub>1</sub>/Ni(OH)<sub>2</sub>.

**Synthesis of Zr<sub>1</sub>/Ni(OH)<sub>2</sub> and Hf<sub>1</sub>/Ni(OH)<sub>2</sub>.** The synthesis process of Zr<sub>1</sub>/Ni(OH)<sub>2</sub> and Hf<sub>1</sub>/Ni(OH)<sub>2</sub> are similar to that of Ti<sub>1</sub>/Ni(OH)<sub>2</sub>, except that 0.1 M ZrCl<sub>4</sub> and 0.1 M HfCl<sub>4</sub> was used to replace titanium diisopropoxide bis(acetylacetonate).

**XAFS data analysis.** Acquired EXAFS data were processed according to standard procedures using the ATHENA module implemented in the IFEFFIT software packages. We obtained the EXAFS spectra through post-edge background subtraction from the overall absorption and normalizing with respect to the edge-jump step. The Ti *K*-edge *k*<sup>2</sup>-weighted  $\chi(k)$  data in the *k*-space ranging from 3 to 12 Å<sup>-1</sup> were Fourier-transformed to real (*R*) space using a Hanning windows ( $dk = 0.3 \text{ \AA}^{-1}$ ) to separate the EXAFS contributions from different coordination shells. *R* represents the radial distribution function. To obtain the detailed structural parameters around the Ti atom in the as-prepared samples, quantitative curve fittings were carried out for the Fourier-transformed  $k^2\chi(k)$  in *R*-space using the ARTEMIS module of IFEFFIT. Effective backscattering amplitudes *F*(*k*) and phase shifts  $\Phi(k)$  of all fitting paths were calculated with the ab initio code FEFF9.0. For the samples, a *k*-range of 3-12 Å<sup>-1</sup> was used and curve fittings were carried out in *R*-space within an *R* range of [1-2] Å for *k*<sup>2</sup>-weighted  $\chi(k)$  functions.

**Photocatalytic Measurements.** To prepare a colloidal suspension, 5 mg of catalysts were dispersed in 5 mL distilled H<sub>2</sub>O with ultrasonication, and the amount of catalyst added in the photocatalytic system was determined by the volume of the suspension. The photocatalytic CO<sub>2</sub> reduction experiments were carried out under 1 atm CO<sub>2</sub> atmosphere in a 60-mL quartz reactor containing catalyst (1 mg), Ru(phen)<sub>3</sub>Cl<sub>2</sub> (10 mg) BIH (40 mg) and the mixed solvent CH<sub>3</sub>CN/H<sub>2</sub>O (*v/v* = 4:1, 5 mL). The reaction mixture was continuously stirred and irradiated under LED light (400 – 800 nm) in a multi-channel photochemical reactioning system (PCX-50C, Beijing Perfectlight Co. Ltd., China). The reaction temperature was controlled as 25 °C by circulating water. The generated gas samples were analyzed by a GC-2014 gas chromatographer equipped with a thermal conductivity detector (TCD) and a flame ionization detector (FID). The liquid-phase were analyzed by a Bruker AVANCE III 400 MHz instrument. After a cycle of photocatalytic reduction, the catalyst was centrifuged and washed with water for the next run. After adding identical amount of fresh CH<sub>3</sub>CN/H<sub>2</sub>O, BIH and [Ru(phen)<sub>3</sub>]Cl<sub>2</sub>·6H<sub>2</sub>O, CO<sub>2</sub> was reintroduced to the photocatalytic system under the same operating conditions. In isotope experiments, <sup>13</sup>CO<sub>2</sub> was used to replace <sup>12</sup>CO<sub>2</sub> as carbon source and the gas products were analyzed by gas chromatography-mass spectrometry (GC-MS, Agilent 7890B-5977A).

**Density functional theory (DFT) calculations.** All DFT calculations were performed using the projector augmented wave (PAW) method<sup>3</sup> with the plane-wave basis set as implemented in Vienna ab

initio simulation package (VASP) with a cutoff energy of 460 eV.<sup>4</sup> A cutoff energy of 460 eV was used. The Perdew-Burke-Ernzerhof (PBE) functional as formulated in the generalized gradient approximation (GGA)<sup>5</sup> was utilized to describe electronic exchange and correlation, and the projector augmented wave (PAW) method<sup>3</sup> was applied to represent the core-valence electron interaction. Hubbard U corrections (DFT+U) with U=5.5 for Ni 3*d* and U=3.5 for Ti 3*d* electrons were applied to mitigate the self-interaction error according to previous studies.<sup>6</sup> A gamma grid of 3 × 3 × 1 k-point was employed for all calculations. The convergence criterion for the electronic self-consistent field loop was set to 1 × 10<sup>-5</sup> eV. The structures were optimized until the residual forces of each atom were below 0.03 eV/Å. The β-Ni(OH)<sub>2</sub> (001) surface was modeled using a 3 × 3 periodically slab. For all surface systems, the bottom two-layer atoms were fixed to maintain the bulk structure while other atoms were fully relaxed (as shown in Figure S14d). A 15 Å vacuum space was used to minimize interaction from neighboring cells. The d-Ni(OH)<sub>2</sub> and Ti<sub>1</sub>/Ni(OH)<sub>2</sub> were obtained by removing one Ni atom and replacing one Ni atom with a Ti atom from the first layer of β-Ni(OH)<sub>2</sub>, respectively.

For CO<sub>2</sub> reduction to CO, following primary elemental steps are considered here:

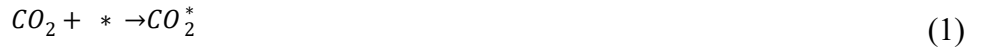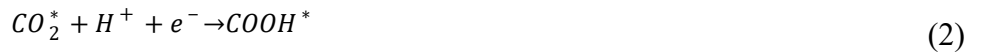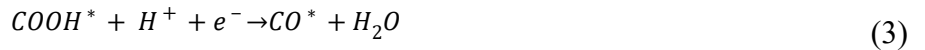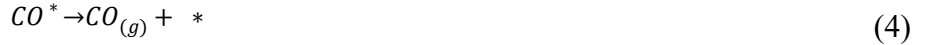

The computational hydrogen electrode (CHE) model<sup>7</sup> was used to represent the chemical potentials of proton-electron pair. The Gibbs free energy changes (ΔG) for each element step was calculated by ΔG=ΔE+ΔZPE-TΔS, where the ΔE, ΔZPE and ΔS are the change of total energy, zero-point energy and entropy (298.15 K), respectively.

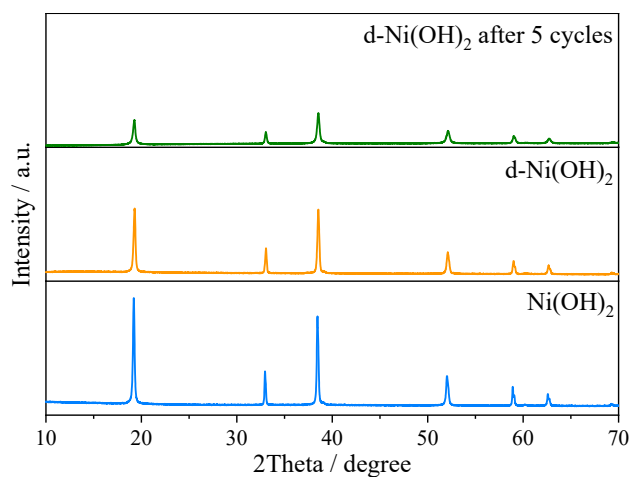

**Fig. S1.** PXR D patterns of Ni(OH)<sub>2</sub>, d-Ni(OH)<sub>2</sub> and d-Ni(OH)<sub>2</sub> synthesized after 5 cycles.

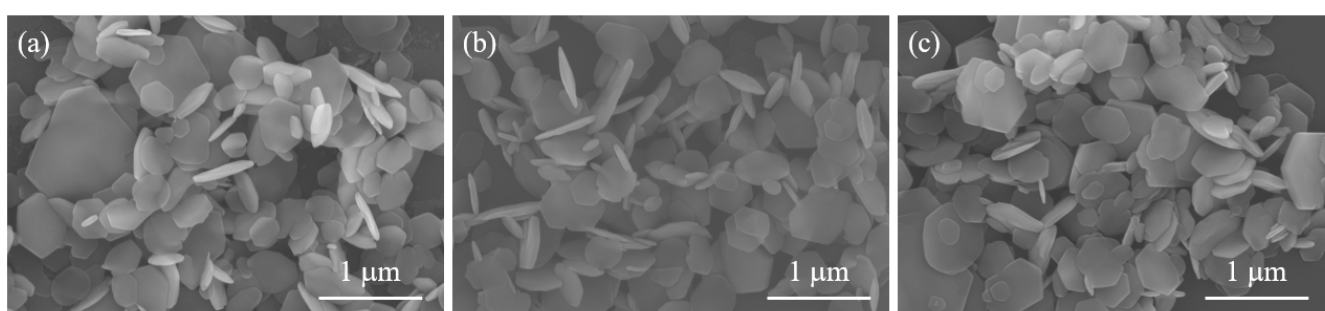

**Fig. S2.** SEM images of (a) Ni(OH)<sub>2</sub>, (b) d-Ni(OH)<sub>2</sub> and (c) Ti<sub>1</sub>/Ni(OH)<sub>2</sub>.

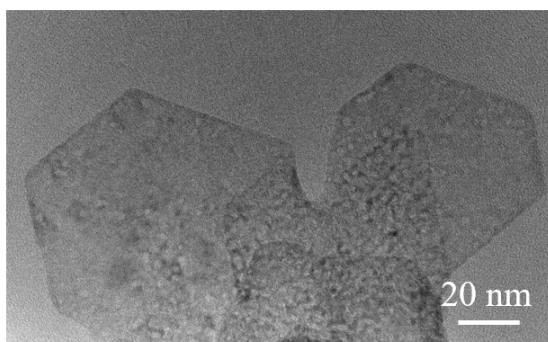

**Fig. S3.** TEM images of d-Ni(OH)<sub>2</sub>.

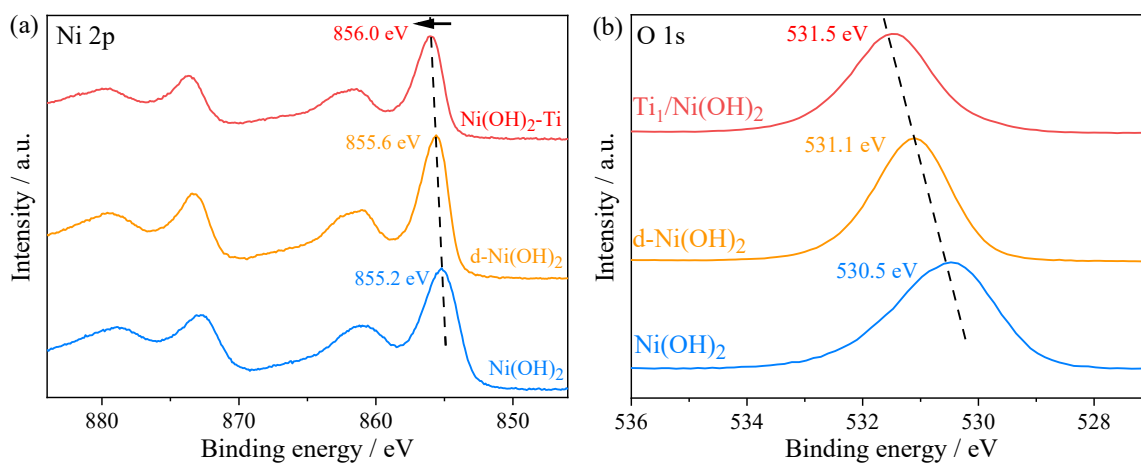

**Fig. S4.** (a) Ni 2p and (b) O 1s XPS spectra of Ni(OH)<sub>2</sub>, d-Ni(OH)<sub>2</sub> and Ti<sub>1</sub>/Ni(OH)<sub>2</sub>.

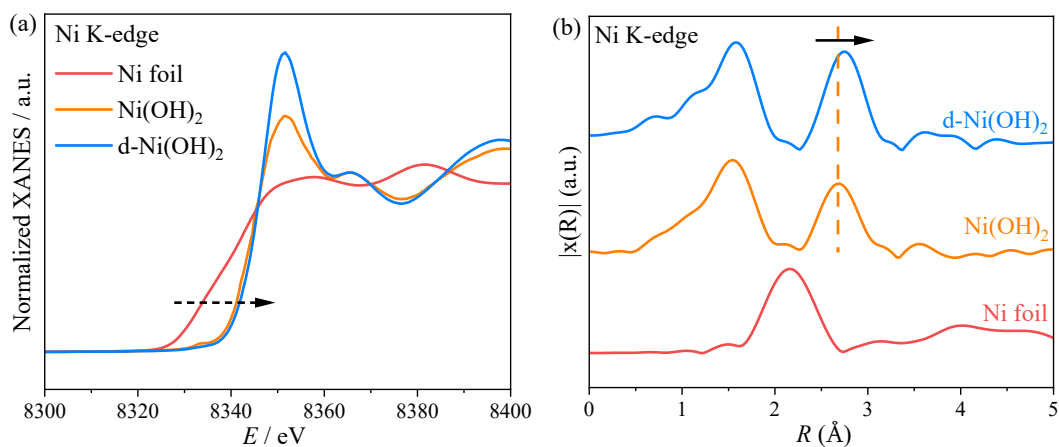

**Fig. S5.** Ni K-edge (a) XANES and (b) EXAFS spectra of d-Ni(OH)<sub>2</sub>, Ni(OH)<sub>2</sub> and Ni foil.

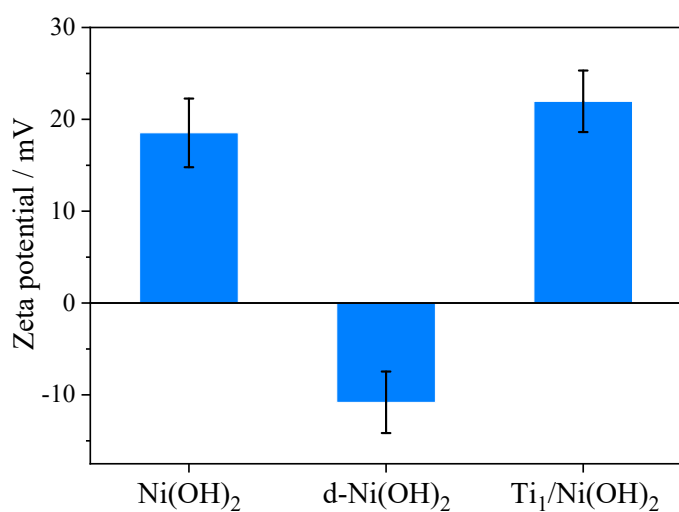

**Fig. S6.** Zeta potentials of Ni(OH)<sub>2</sub>, d-Ni(OH)<sub>2</sub> and Ti<sub>1</sub>/Ni(OH)<sub>2</sub>.



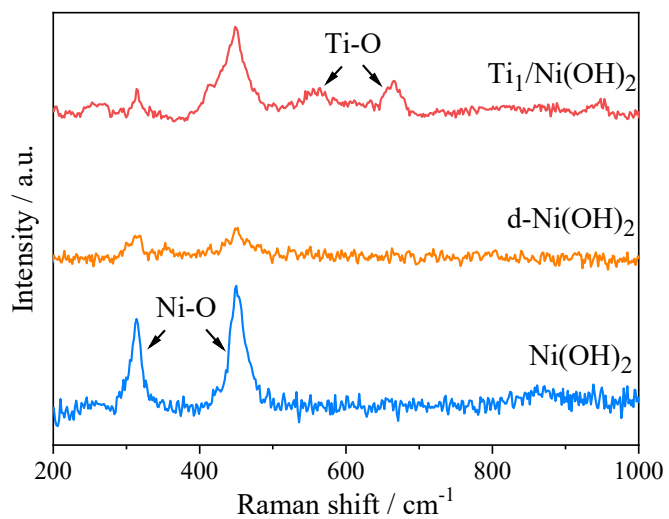

**Fig. S7.** Raman spectra of  $\text{Ti}_1/\text{Ni}(\text{OH})_2$ ,  $\text{d-Ni}(\text{OH})_2$  and  $\text{Ni}(\text{OH})_2$ .

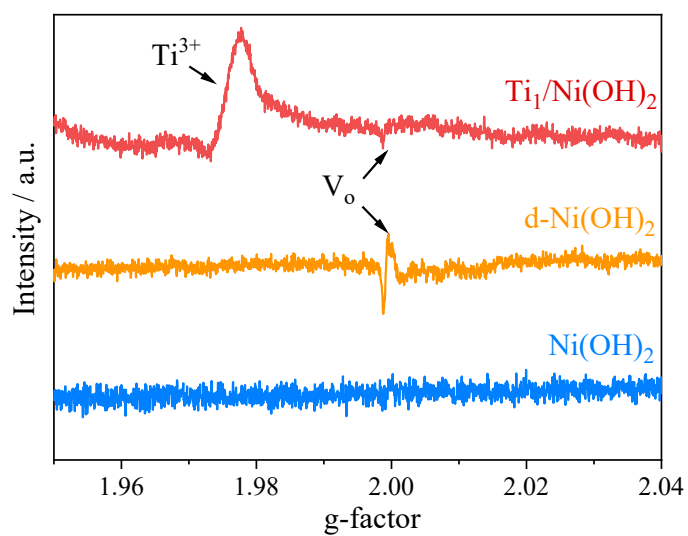

**Fig. S8.** EPR spectra of  $\text{Ni}(\text{OH})_2$ ,  $\text{d-Ni}(\text{OH})_2$  and  $\text{Ti}_1/\text{Ni}(\text{OH})_2$ .

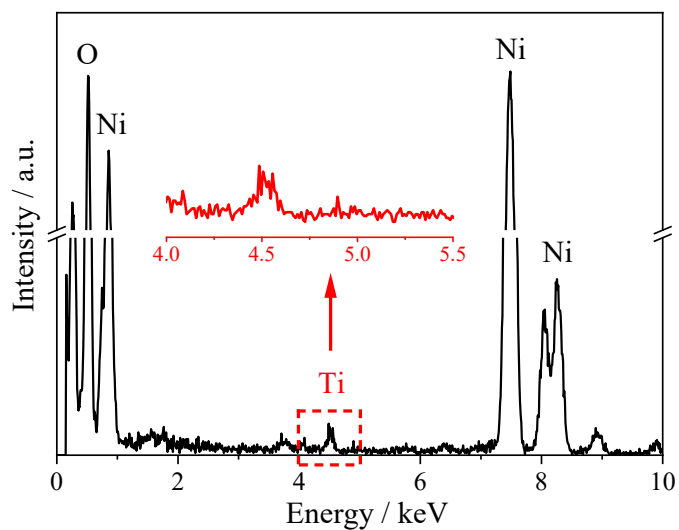

**Fig. S9.** EDS spectra of  $\text{Ti}_1/\text{Ni}(\text{OH})_2$ .

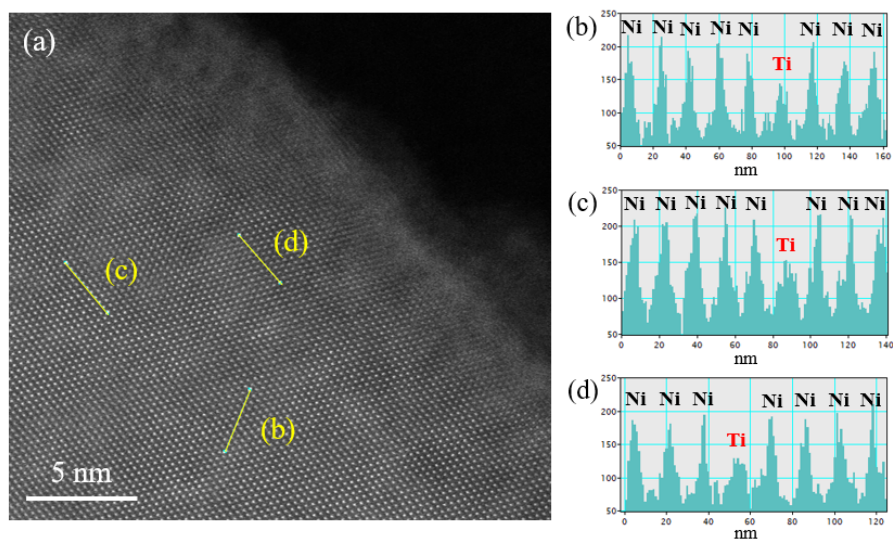

**Fig. S10.** (a) HAADF-STEM image of  $\text{Ti}_1/\text{Ni}(\text{OH})_2$  and (b-d) the corresponding brightness intensity of the yellow line profiles taken in the HAADF-STEM image.

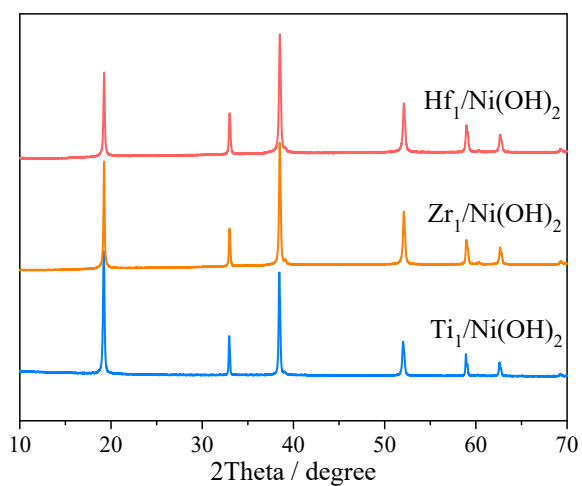

**Fig. S11.** PXRD patterns of  $\text{Ti}_1/\text{Ni}(\text{OH})_2$ ,  $\text{Zr}_1/\text{Ni}(\text{OH})_2$  and  $\text{Hf}_1/\text{Ni}(\text{OH})_2$ .

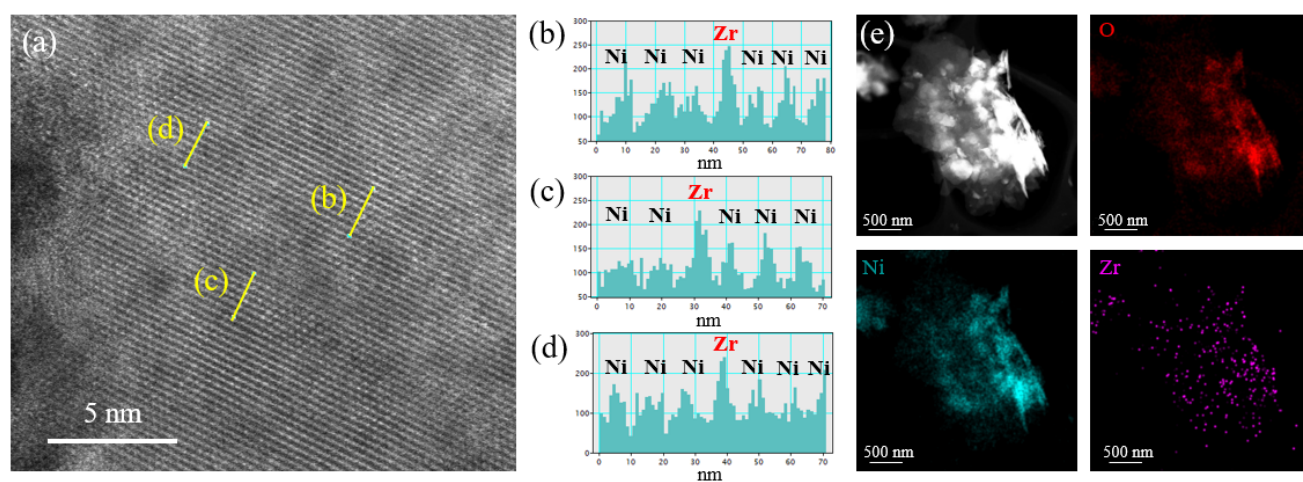

**Fig. S12.** (a) HAADF-STEM image of  $\text{Zr}_1/\text{Ni}(\text{OH})_2$  and (b-d) the corresponding brightness intensity of the yellow line profiles taken in the HAADF-STEM image. (e) HAADF-STEM image of  $\text{Zr}_1/\text{Ni}(\text{OH})_2$  and the corresponding elemental mapping images of O, Ni and Zr.

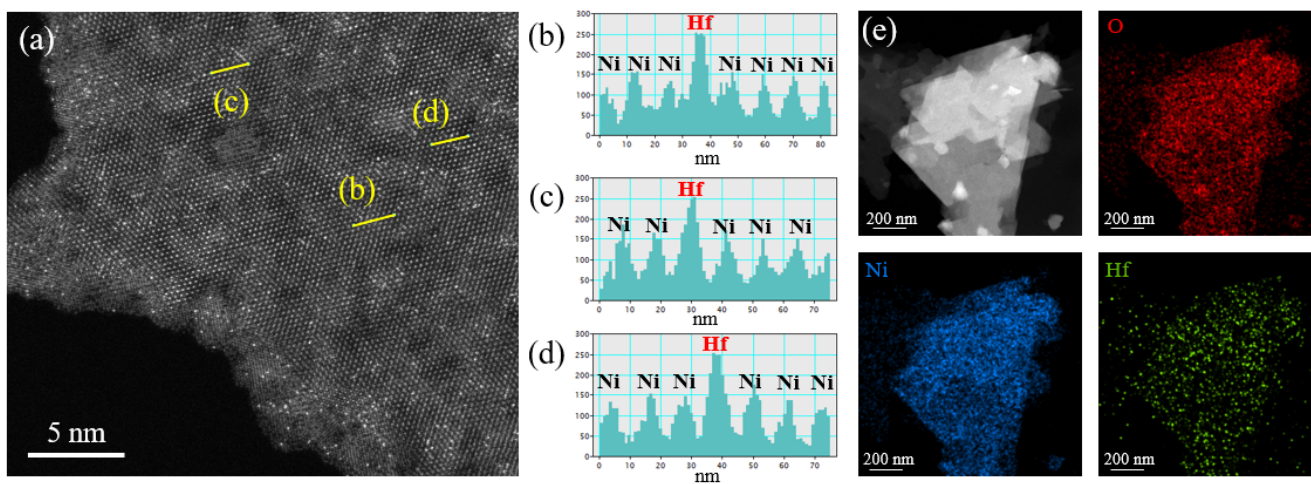

**Fig. S13.** (a) HAADF-STEM image of  $\text{Hf}_1/\text{Ni}(\text{OH})_2$  and (b-d) the corresponding brightness intensity of the yellow line profiles taken in the HAADF-STEM image. (e) HAADF-STEM image of  $\text{Hf}_1/\text{Ni}(\text{OH})_2$  and the corresponding elemental mapping images of O, Ni and Hf.

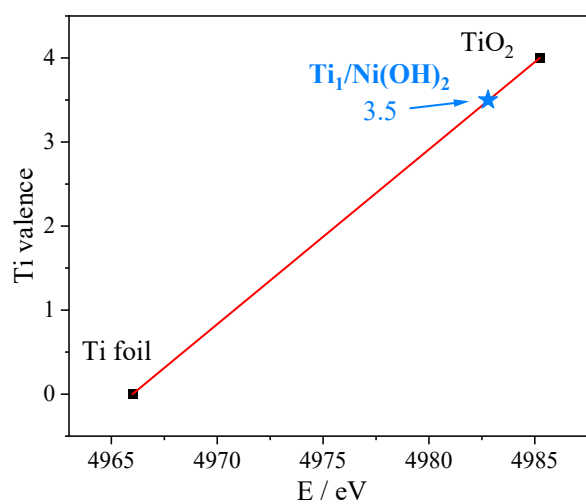

**Fig. S14.** Fitted average oxidation states of Ti in Ti foil,  $\text{TiO}_2$  and  $\text{Ti}_1/\text{Ni}(\text{OH})_2$ .

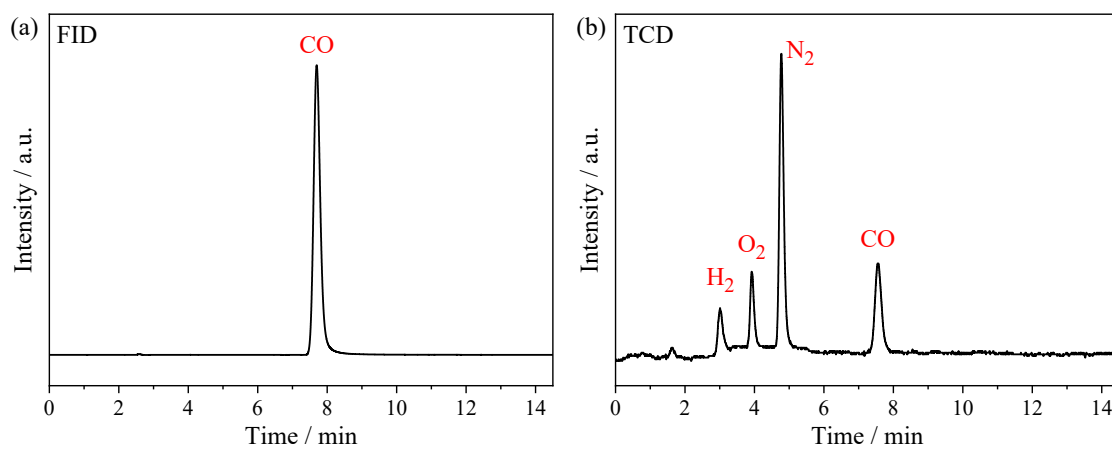

**Fig. S15.** GC profiles for the gaseous products from the photocatalytic experiments of  $\text{Ti}_1/\text{Ni}(\text{OH})_2$ .

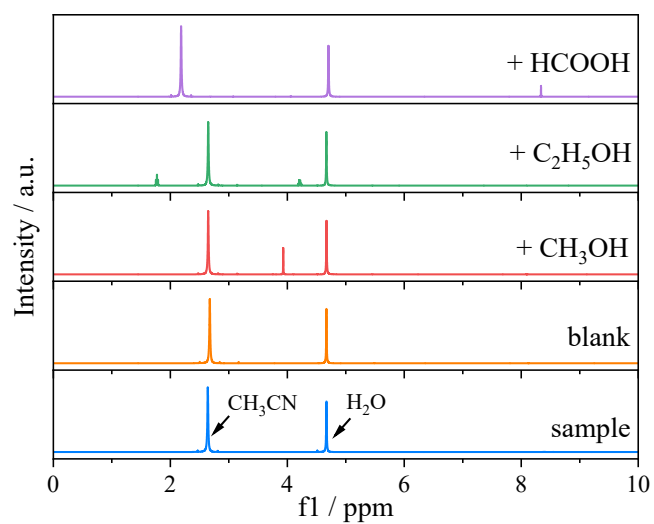

**Fig. S16.**  $^1\text{H}$  NMR spectra of the liquid products from the photocatalytic experiments of  $\text{Ti}_1/\text{Ni}(\text{OH})_2$ . Deuterated solvent:  $\text{D}_2\text{O}$ .

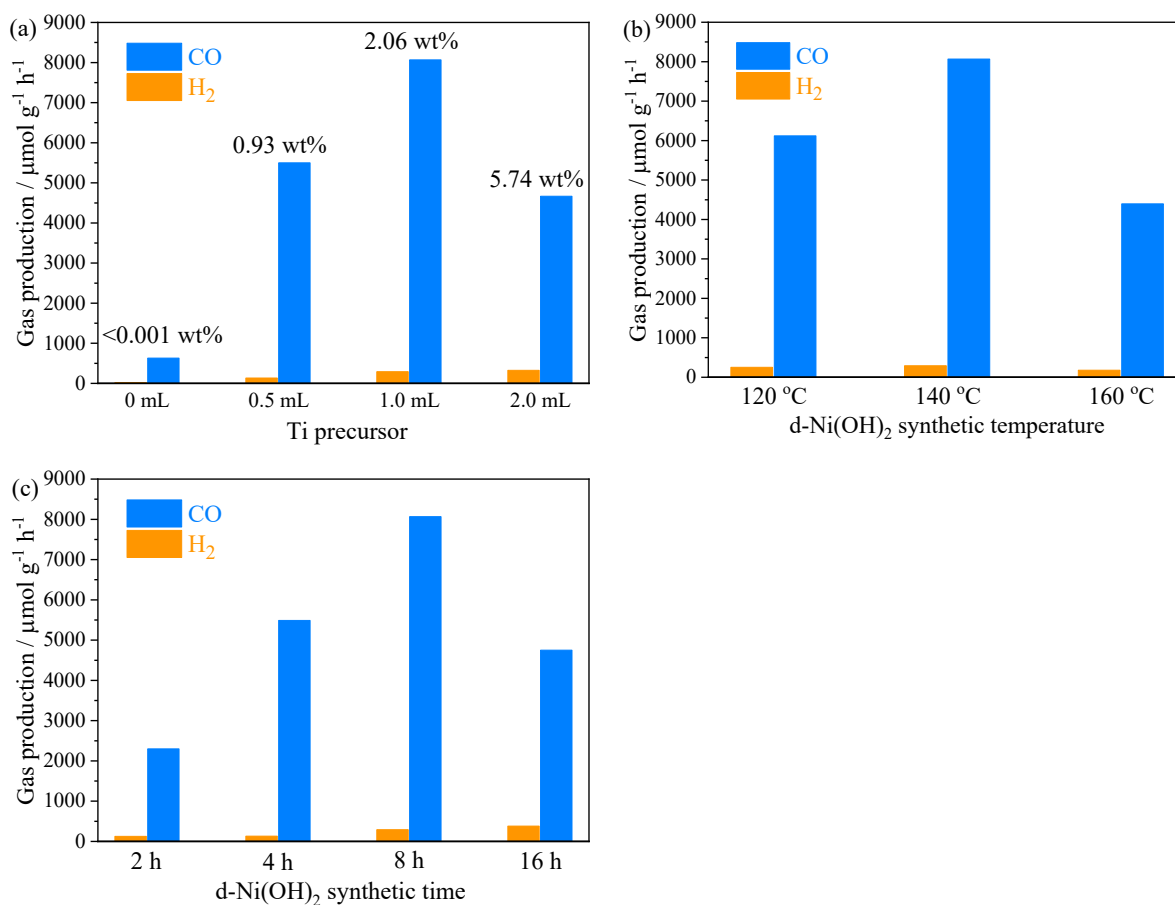

**Fig. S17.** Performance of photocatalytic CO<sub>2</sub> reduction using Ti<sub>1</sub>/Ni(OH)<sub>2</sub> prepared under different conditions: (a) different amounts of Ti precursor/Ti wt%, (b) different synthetic temperatures and (c) synthetic times of d-Ni(OH)<sub>2</sub>

Shorter time or lower temperature in d-Ni(OH)<sub>2</sub> synthesis may lead to less defective support, which cause the lack of anchoring sites for monodispersed Ti atoms, resulting in inadequate active sites and lower performance. On the other hand, longer time or higher temperature in d-Ni(OH)<sub>2</sub> synthesis may cause complete collapse of support, hindering charge transfer in photocatalysis and leading to lower performance. As for the amount of Ti precursor, which directly affects the Ti content of Ti/Ni(OH)<sub>2</sub>, lower amount leads to insufficient active sites, while higher amount could lead to aggregation and stacking of neighboring active sites or even partially destroyed support, both of which have negative effects on photocatalytic performance.

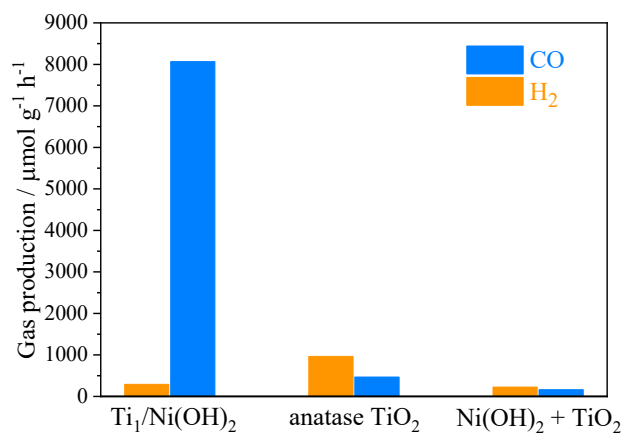

**Fig. S18.** Comparison of the photocatalytic performances of Ti<sub>1</sub>/Ni(OH)<sub>2</sub>, anatase TiO<sub>2</sub> and the mixture of Ni(OH)<sub>2</sub> + TiO<sub>2</sub>.

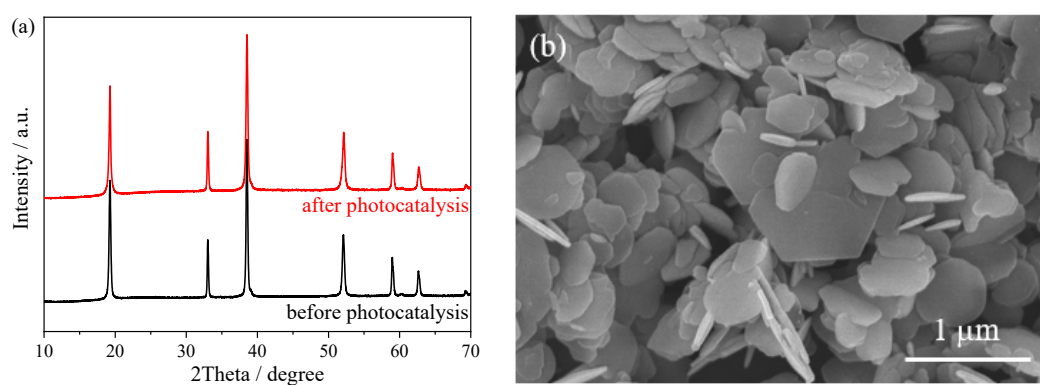

**Fig. S19.** Stability test of Ti<sub>1</sub>/Ni(OH)<sub>2</sub> after photocatalytic experiments. (a) PXRD patterns, (b) SEM image.

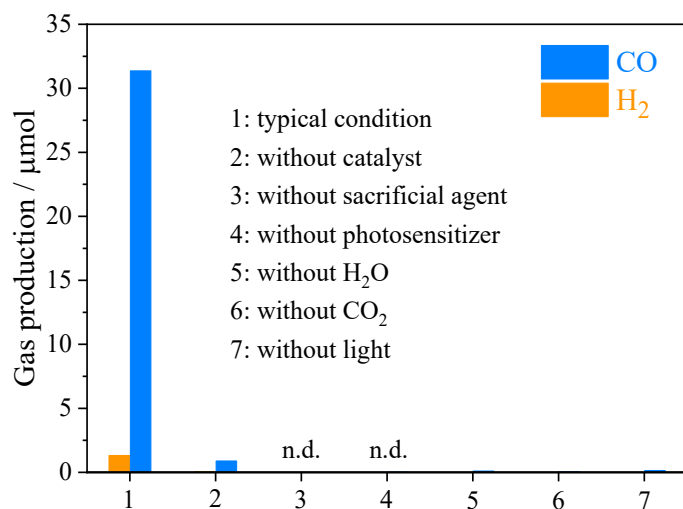

**Fig. S20.** Control experiments of catalytic conditions.

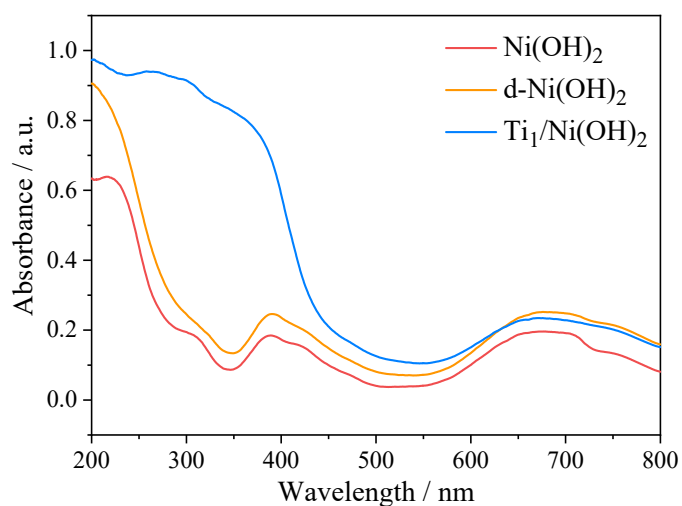

**Fig. S21.** UV-vis spectra of  $\text{Ti}_1/\text{Ni}(\text{OH})_2$ ,  $\text{d-Ni}(\text{OH})_2$  and  $\text{Ni}(\text{OH})_2$ .

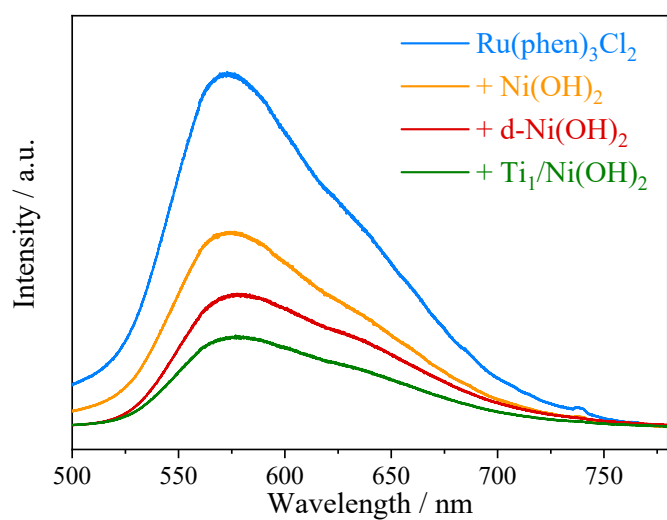

**Fig. S22.** PL emission spectra of  $[\text{Ru}(\text{phen})_3]\text{Cl}_2 \cdot 6\text{H}_2\text{O}$  with the colloidal suspension of  $\text{Ni}(\text{OH})_2$ ,  $\text{d-Ni}(\text{OH})_2$  and  $\text{Ti}_1/\text{Ni}(\text{OH})_2$  excited with 465 nm light.

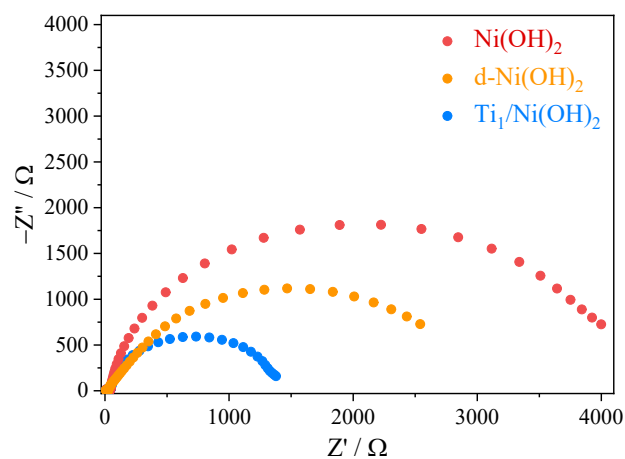

**Fig. S23.** EIS Nyquist plots of  $\text{Ni}(\text{OH})_2$ ,  $\text{d-Ni}(\text{OH})_2$  and  $\text{Ti}_1/\text{Ni}(\text{OH})_2$ .



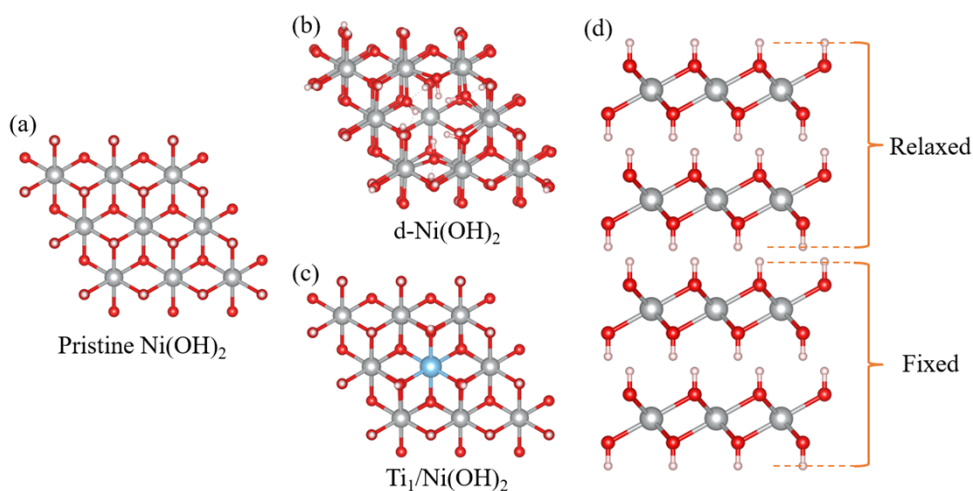

**Fig. S24.** Atomic structures of (a) Ni(OH)<sub>2</sub>, (b) d-Ni(OH)<sub>2</sub> and (c) Ti<sub>1</sub>/Ni(OH)<sub>2</sub>. Color codes: red, O; gray, Ni; cyan, Ti; white, H.

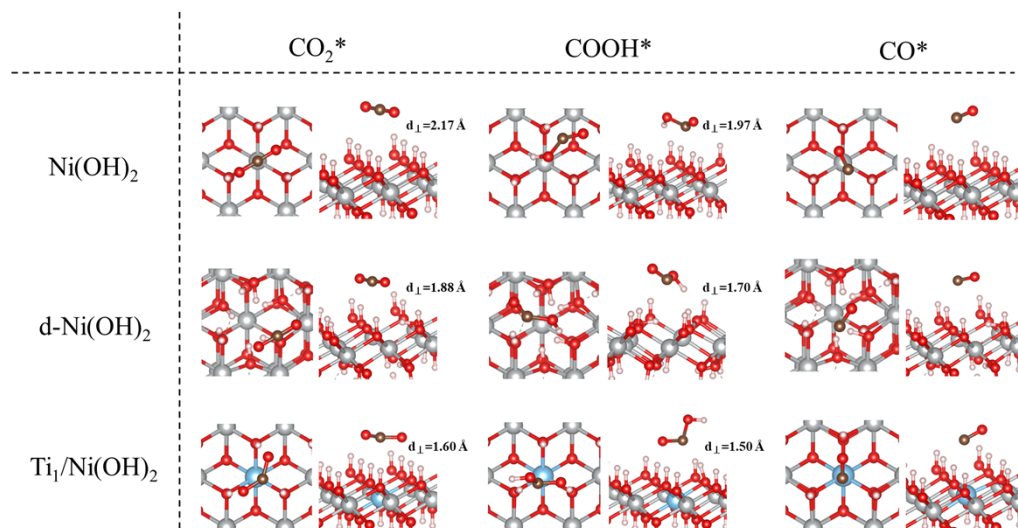

**Fig. S25.** Adsorption configurations of intermediates involved in photocatalytic CO<sub>2</sub> reduction on Ni(OH)<sub>2</sub>, d-Ni(OH)<sub>2</sub> and Ti<sub>1</sub>/Ni(OH)<sub>2</sub>. Distances (d<sub>⊥</sub>) represent the vertical distance between substrates and reaction intermediates (CO<sub>2</sub><sup>\*</sup> and COOH<sup>\*</sup>). Color codes: red, O; gray, Ni; cyan, Ti; brown, C; white, H.

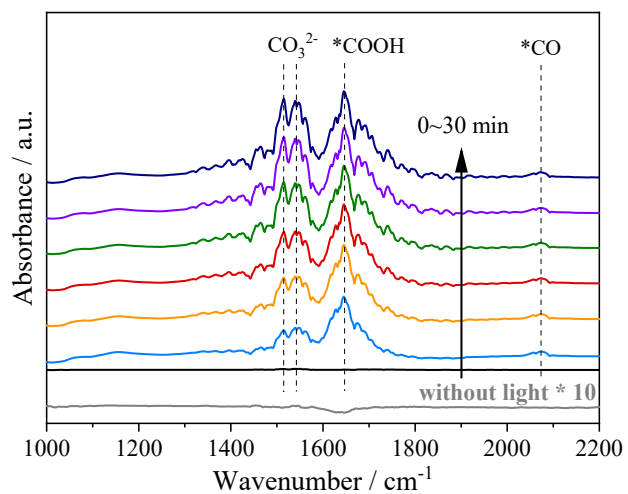

**Fig. S26.** In-situ FTIR spectra of the photocatalytic CO<sub>2</sub> reduction on Ti<sub>1</sub>/Ni(OH)<sub>2</sub>.

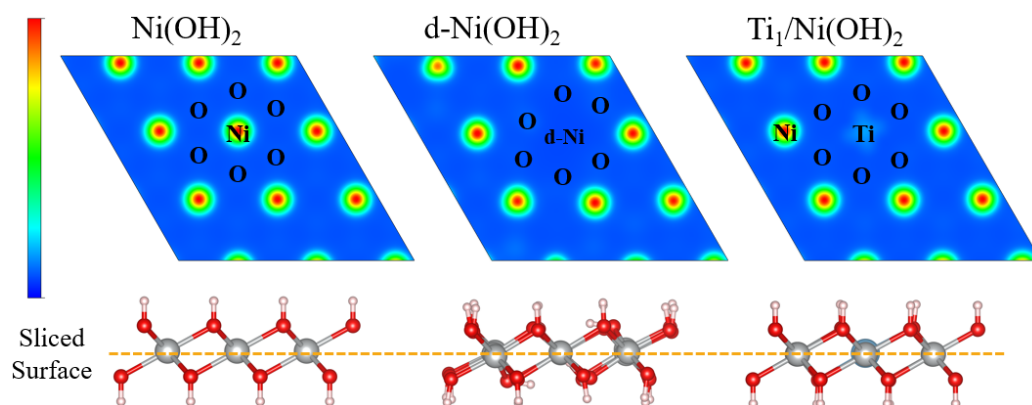

**Fig. S27.** Charge density distribution of Ni(OH)<sub>2</sub>, d-Ni(OH)<sub>2</sub> and Ti<sub>1</sub>/Ni(OH)<sub>2</sub>.

**Table S1.** ICP-MS analysis results of  $\text{Ti}_1/\text{Ni}(\text{OH})_2$ .

| $\text{Ti}_1/\text{Ni}(\text{OH})_2$                       | $w_{\text{Ni}}/\text{mg L}^{-1}$ | $w_{\text{Ti}}/\text{mg L}^{-1}$ | $n_{\text{Ni}}/\text{mmol L}^{-1}$ | $n_{\text{Ti}}/\text{mmol L}^{-1}$ | Ti wt%                                |
|------------------------------------------------------------|----------------------------------|----------------------------------|------------------------------------|------------------------------------|---------------------------------------|
| Test 1                                                     | 63.1                             | 1.98                             | 1.07                               | 0.041                              | 1.99                                  |
| Test 2                                                     | 40.4                             | 1.41                             | 0.69                               | 0.029                              | 2.21                                  |
| Test 3                                                     | 40.7                             | 1.27                             | 0.69                               | 0.026                              | 1.98                                  |
| average                                                    | /                                | /                                | /                                  | /                                  | 2.06                                  |
| Mother liquor from d- $\text{Ni}(\text{OH})_2$ synthesis   | 8.36                             | /                                | 0.14                               | /                                  | 1.86% of Ni dissolved <sup>a</sup>    |
| $\text{Ti}_1/\text{Ni}(\text{OH})_2$ before photocatalysis | 41.6                             | 1.41                             | 0.71                               | 0.029                              | 2.14                                  |
| $\text{Ti}_1/\text{Ni}(\text{OH})_2$ after photocatalysis  | 115.6                            | 3.81                             | 1.96                               | 0.079                              | 2.09                                  |
| Mother liquor from photocatalysis                          | 0.011                            | 0.0013                           | /                                  | /                                  | 0.13% of Ni and 0.32% of Ti dissolved |
| 0 mL Ti precursor                                          | 186.5                            | 0.0055                           | 3.16                               | 0.00011                            | <0.001                                |
| 0.5 mL Ti precursor                                        | 183.3                            | 2.67                             | 3.11                               | 0.056                              | 0.93                                  |
| 2.0 mL Ti precursor                                        | 53.9                             | 4.87                             | 0.91                               | 0.10                               | 5.74                                  |

<sup>a</sup>As presented in the experimental details, d- $\text{Ni}(\text{OH})_2$  was synthesized from 50 mg  $\text{Ni}(\text{OH})_2$  in a mixed solution with a total volume of 7 mL. Prior to the ICP-MS tests, only 1 mL of the mother liquor was used for digestion and eventually diluted to 10 mL. According to the ICP-MS result, the concentration of Ni ions in the digestion solution was detected as 8.36  $\text{mg L}^{-1}$ . The mass fraction of Ni in  $\text{Ni}(\text{OH})_2$  is 63.3%. Therefore, the percentage of leaking Ni was calculated as:  $(8.36 \text{ mg L}^{-1} \times 10 \text{ mL} \times 0.001 \times 7) / (50 \text{ mg} \times 63.3\%) \times 100\% = 1.86\%$ , which confirmed that most of the introduced Ti atoms were anchored in the defect sites.

**Table S2.** EXAFS fitting parameters at the Ti K-edge for various samples

| Sample                               | Shell | $CN^a$ | $R(\text{\AA})^b$ | $\sigma^2(\text{\AA}^2)^c$ | $\Delta E_0(\text{eV})^d$ | $R$ factor |
|--------------------------------------|-------|--------|-------------------|----------------------------|---------------------------|------------|
| TiO <sub>2</sub>                     | Ti-O  | 6      | 1.94±0.01         | 0.0047±0.0010              | -5.0±1.5                  | 0.0120     |
| Ti foil                              | Ti-Ti | 6      | 2.91±0.02         | 0.0062±0.0004              | 5.0±0.8                   | 0.0175     |
| Ti <sub>1</sub> /Ni(OH) <sub>2</sub> | Ti-O  | 5.7    | 2.02±0.10         | 0.0092±0.0011              | -1.4±2.1                  | 0.0115     |

<sup>a</sup> $CN$ , coordination number;

<sup>b</sup> $R$ , distance between absorber and backscatter atoms;

<sup>c</sup> $\sigma^2$ , Debye-Waller factor to account for both thermal and structural disorders;

<sup>d</sup> $\Delta E_0$ , inner potential correction;

<sup>e</sup> $R$  factor indicates the goodness of the fit.

$S_0^2$  was fixed to 0.7, according to the experimental EXAFS fit of Ti foil by fixing  $CN$  as the known crystallographic value. Fitting range:  $3.0 \leq k (\text{\AA}^{-1}) \leq 12$  and  $1.0 \leq R (\text{\AA}) \leq 2.0$  (TiO<sub>2</sub>);  $3.0 \leq k (\text{\AA}^{-1}) \leq 12.0$  and  $1.0 \leq R (\text{\AA}) \leq 3.0$  (Ti foil);  $3.0 \leq k (\text{\AA}^{-1}) \leq 12.0$  and  $1.0 \leq R (\text{\AA}) \leq 2.0$  (Ti<sub>1</sub>/Ni(OH)<sub>2</sub>).

**Table S3** Comparison of the photocatalytic activities of Ti<sub>1</sub>/Ni(OH)<sub>2</sub> and other reported catalysts for photocatalytic CO<sub>2</sub> reduction to CO.

| Material                                            | Solvent                             | $\lambda$  | Major Products      | Generation Rate / mmol g <sup>-1</sup> h <sup>-1</sup> | CO Selectivity | Ref.                                                                 |
|-----------------------------------------------------|-------------------------------------|------------|---------------------|--------------------------------------------------------|----------------|----------------------------------------------------------------------|
| Ti <sub>1</sub> /Ni(OH) <sub>2</sub>                | CH <sub>3</sub> CN-H <sub>2</sub> O | 410–760 nm | CO, H <sub>2</sub>  | CO 8.09                                                | 96.5%          | <b>This work</b>                                                     |
| Co-OAc                                              | CH <sub>3</sub> CN                  | >380 nm    | CO, H <sub>2</sub>  | CO 2.33                                                | 99.1%          | <i>J. Am. Chem. Soc.</i> <b>2024</b> , <i>146</i> , 3241             |
| Zn <sub>x</sub> Cd <sub>1-x</sub> S-Co <sub>1</sub> | CH <sub>3</sub> CN-H <sub>2</sub> O | >400 nm    | CO, H <sub>2</sub>  | CO 7.63                                                | /              | <i>J. Am. Chem. Soc.</i> <b>2024</b> , <i>146</i> , 9721             |
| Ni-SA                                               | CH <sub>3</sub> CN-H <sub>2</sub> O | 410–760 nm | CO, H <sub>2</sub>  | CO 6.96                                                | 96.6%          | <i>Nano Res.</i> <b>2023</b> , <i>16</i> , 7756                      |
| Co-SA                                               | CH <sub>3</sub> CN-H <sub>2</sub> O | 410–760 nm | CO, H <sub>2</sub>  | CO 2.95                                                | 73.8%          |                                                                      |
| NNU-55-Ni                                           | CH <sub>3</sub> CN-H <sub>2</sub> O | ≥ 420 nm   | CO, H <sub>2</sub>  | CO 0.267                                               | 81.0%          | <i>Nat. Comm.</i> <b>2022</b> , <i>13</i> , 2964.                    |
| HOF-25-Ni                                           | CH <sub>3</sub> CN-H <sub>2</sub> O | > 420 nm   | CO, H <sub>2</sub>  | CO 20.7                                                | 86.5%          | <i>Angew. Chem. Int. Ed.</i> <b>2022</b> , <i>61</i> , e202211482.   |
| BIF-107                                             | CH <sub>3</sub> CN-H <sub>2</sub> O | > 420 nm   | CO, H <sub>2</sub>  | CO 1.19                                                | 55.7%          | <i>Inorg. Chem.</i> <b>2020</b> , <i>59</i> , 17851.                 |
| 2D-Co <sub>2</sub> TCPE                             | CH <sub>3</sub> CN-H <sub>2</sub> O | > 420 nm   | CO, H <sub>2</sub>  | CO 4.15                                                | 74.36%         | <i>Angew. Chem. Int. Ed.</i> <b>2020</b> , <i>59</i> , 23588.        |
| 2D-Ni <sub>2</sub> TCPE                             | CH <sub>3</sub> CN-H <sub>2</sub> O | > 420 nm   | CO, H <sub>2</sub>  | CO 3.00                                                | 97.3%          |                                                                      |
| PCN-250-Fe <sub>2</sub> Mn                          | CH <sub>3</sub> CN-H <sub>2</sub> O | > 420 nm   | CO, H <sub>2</sub>  | CO 21.51                                               | 82.17%         | <i>Appl. Catal. B: Environ.</i> , <b>2020</b> , <i>276</i> , 119173. |
| MAF-X27I-OH                                         | CH <sub>3</sub> CN-H <sub>2</sub> O | 420 nm     | CO, H <sub>2</sub>  | /                                                      | 98.2%          | <i>J. Am. Chem. Soc.</i> <b>2018</b> , <i>140</i> , 38.              |
| MOF-525-Co                                          | CH <sub>3</sub> CN                  | > 400 nm   | CO, CH <sub>4</sub> | CO 0.20                                                | 84.6%          | <i>Angew. Chem. Int. Ed.</i> <b>2016</b> , <i>55</i> , 14310.        |
| Ni MOLs                                             | CH <sub>3</sub> CN-H <sub>2</sub> O | > 400 nm   | CO, H <sub>2</sub>  | CO 12.5                                                | 97.8%          | <i>Angew. Chem. Int. Ed.</i> <b>2018</b> , <i>57</i> , 1.            |

## References

- 1 D. S. He, *Ultramicroscopy*, 2023, **253**: 113797.
- 2 T.-H. Wu, B.-W. Hou, *Catal. Sci. Technol.*, 2021, **11**, 4294.
- 3 P. E. Blöchl, *Phys. Rev. B*, 1994, **50**, 17953-17979.
- 4 (a) G. Kresse, J. Furthmüller, *Phys. Rev. B* 1996, **54**, 11169-11186; (b) G. Kresse, J. Furthmüller, *Comp. Mater. Sci.* 1996, **6**, 15-50.
- 5 J. P. Perdew, K. Burke, M. Ernzerhof, *Phys. Rev. Lett.* 1996, **77**, 3865-3868.
- 6 (a) Y. Sakamoto, Y. Noda, K. Ohno, S. Nakamura, *J. Phys. Chem. C* 2017, **121**, 24603-24611; (b) S. J. Johnston, R. M. Choueiri, X. Liu, B. J. R. Laframboise, S. W. Tatarchuk, L. D. Chen, *J. Phys. Chem. C* 2024, **128**, 5568-5578; (c) A. Tilocca, A. Selloni, *J. Phys. Chem. C* 2012, **116**, 9114-9121; (d) A. Alghannam, C. L. Muhich, C. B. Musgrave, *Phys. Chem. Chem. Phys.* 2017, **19**, 4541-4552.
- 7 J. K. Nørskov, J. Rossmeisl, A. Logadottir, L. Lindqvist, J. R. Kitchin, T. Bligaard, H. Jónsson, *J. Phys. Chem. B* 2004, **108**, 17886-17892.
